# Supplementary material for: ZIF-derived CoP as a cocatalyst for enhanced photocatalytic H2production activity of g-C3N4
Source: Royal Society of Chemistry journal article supplement (doi:10.1039/c8se00063h), 2018-01-01
Supplement: c8se00063h1.pdf [file c8se00063h1.pdf]

## SUPPORTING INFORMATION

### **ZIF-Derived CoP as Cocatalyst for Enhanced Photocatalytic H<sub>2</sub>**

#### **Production Activity of g-C<sub>3</sub>N<sub>4</sub>**

Xiao-Jun Sun,<sup>a,\*</sup> Dou-Dou Yang,<sup>a</sup> Hong Dong,<sup>a,b</sup> Xiang-Bin Meng,<sup>a</sup>  
Jing-Li Sheng,<sup>a</sup> Xin Zhang,<sup>a</sup> Jin-Zhi Wei<sup>a</sup> and Feng-Ming Zhang<sup>a,\*</sup>

*a. Key Laboratory of Green Chemical Engineering and Technology of  
College of Heilongjiang Province, College of Chemical and  
Environmental Engineering, Harbin University of Science and  
Technology, Harbin 150040, P. R. China.*

*b. Ministry of Education Key Laboratory of Engineer Dielectrics and Its  
Application, College of Material Science and Engineering, Harbin  
University of Science and Technology, Harbin 150040, P. R. China.*

*\*E-mail: zhangfm80@163.com. Fax: (+86) 451 8639 2713.*

## Table of Contents

|                                                                                                 |             |
|-------------------------------------------------------------------------------------------------|-------------|
| Characterization .....                                                                          | S3          |
| Photocatalytic hydrogen production .....                                                        | S3          |
| Electrochemical characterization .....                                                          | S3          |
| Computational details .....                                                                     | S3          |
| <b>Figure S1-S3</b>   Characterizations of ZIF-67 .....                                         | <b>S4</b>   |
| <b>Figure S4-S6</b>   Characterizations of g-C <sub>3</sub> N <sub>4</sub> .....                | <b>S5</b>   |
| <b>Figure S7-S9</b>   Characterizations of photocatalysts .....                                 | <b>S6</b>   |
| <b>Figure S10-S13</b>   Photocatalytic hydrogen production .....                                | <b>S7-9</b> |
| <b>Table S1</b>  Summary of various catalysts for photocatalytic H <sub>2</sub> evolution ..... | <b>S10</b>  |

## Characterization

The characteristics of the materials were investigated by Fourier transform infrared (FTIR) spectra (Spectrum 100), X-ray powder diffraction (XRD) patterns (Bruker D8 X-ray diffractometer), scanning electron microscopy (SEM) micrographs (Hitachi S-4800), the transmission electron microscopy (TEM) experiment (JEM-2100 electron microscope), diffuse reflectance UV-vis spectroscopy techniques (Lambda 35 spectrometer), X-ray photoelectron spectroscopy (XPS) techniques (Kratos-AXIS ULTRA DLD apparatus), the photoluminescence (PL) spectra (SPEX Fluorolog-3 spectrofluorometer) and thermogravimetric analyses (TGA/SDTA851e).

## Photocatalytic hydrogen production

Visible light driven  $H_2$  evolution reactions were conducted in a closed gas circulation and evacuation system fitted with a top window Pyrex cell (CEAULIGHT CEL-SPH2N). Online gas chromatograph of GC112A with a TCD was used in the process to detect the evolution of gas. Make the system vacuumed for 0.5 h to remove the dissolved oxygen with vacuum bump. In a typical reaction, the photocatalyst (30 mg) was added in 50 ml of 10 vol% triethanolamine (TEOA) aqueous solution without  $H_2PtCl_6$  after sonication for 20 min. Then the solution was irradiated with a 300 W Xe lamp equipped with an appropriate cut-off filter under vigorous stirring. Meanwhile, gas circulator was adopted and a cooling water jacket was disposed to keep the temperature of reactor at around 6 °C. Apparent quantum yield (AQY) was calculated by using the following formula:  $AQY = (2 \times \text{the number of evolved hydrogen molecules}) / (\text{the number of incident photons}) \times 100\%$ . To obtain the number of incident photons, the following calculations were done. The number of incident photons  $N = P t \lambda / h c$ . The  $t$  represents reaction time. Planck constant  $h = 6.62606896 \times 10^{-34}$  J·s. Speed of light  $c = 299792458$  m s<sup>-1</sup>. The  $\lambda$  is the wavelength of incident light. Average radiation flux of incident light  $P = E A_R$ . The  $E$  represents the mean of irradiance measured by light power meter. Reactor light receiving area  $A_R = \pi R^2$ . The  $\pi$  is circumference ratio 3.1416. The  $R$  is the corresponding radius of light receiving area. Then, the number of incident photons can be obtained. Notably, wavelengths at 380, 420 and 450 nm were adopted and the corresponding apparent

quantum yields (AQY) were calculated.

### **Electrochemical characterization**

The electrochemical impedance spectra (EIS), Mott-Schottky plot and photocurrent-time (I-T) profiles were recorded on the CHI660e by using three-electrode cells. 0.1 M Na<sub>2</sub>SO<sub>4</sub> solutions, Ag/AgCl reference electrode, a Pt counter electrode and ITO glass substrate electrodes were adopted. The photocatalysts were fabricated onto ITO glass substrate electrodes via immersion in the mixed solution with ethanol suspension of photocatalyst.

### **Computational details**

Geometry optimizations and electronic structure calculations for the periodic systems are based on density functional theory (DFT) methods implemented in the SIESTA package. The generalized gradient approximation (GGA) in the Perdue–Burke–Ernzerhof (PBE) form is used to treat the exchange–correlation potential, and the double-z polarization (DZP) basis sets are selected for the DFT calculations. A real-space grid with an equivalent energy cutoff of 150 Ry is adopted to expand the electron density for numerical integration. A vacuum layer greater than 10 Å is used so that interaction among periodic images can be neglected. All the atoms in the unit cell are fully relaxed with the force on each atom being less than 0.01 eV Å<sup>-1</sup> and the total energy changes being less than 0.0001 eV. The Brillouin zone is sampled at  $1 \times 100 \times 100$  (x, y, and z directions, respectively) Monkhorst meshes for 2D structures.

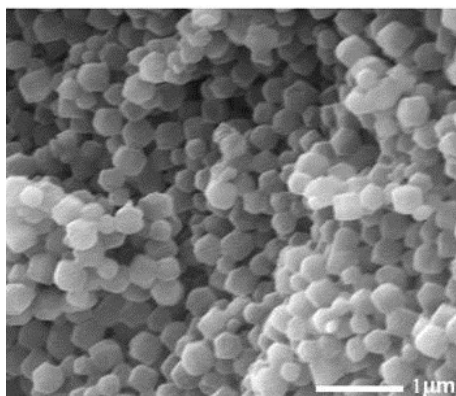

Fig. S1 SEM images of ZIF-67.

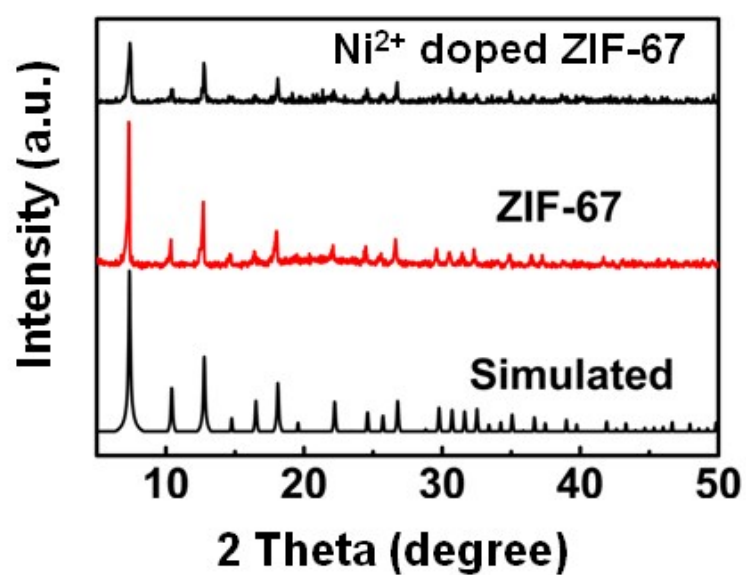

Fig. S2 XRD patterns of ZIF-67,  $\text{Ni}^{2+}$  doped ZIF-67 and the simulated sample.

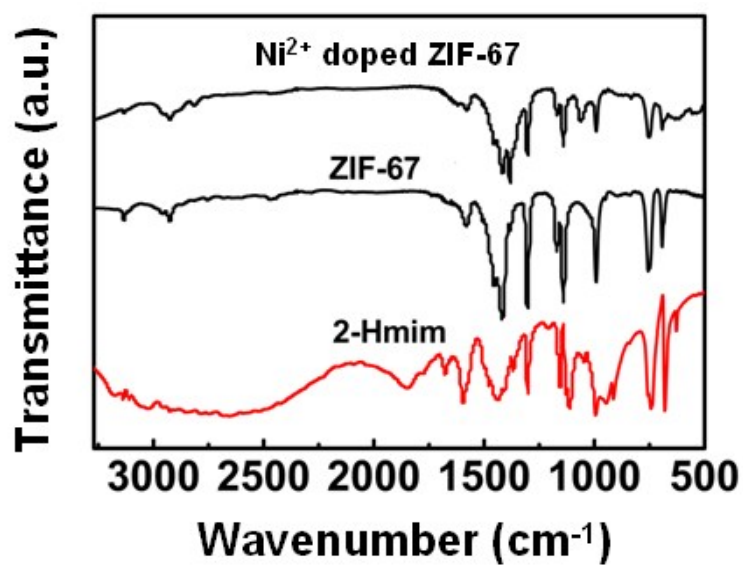

Fig. S3 FT-IR spectra of 2-Hmim (2-methylimidazole) and ZIF-67,  $\text{Ni}^{2+}$  doped ZIF-67.

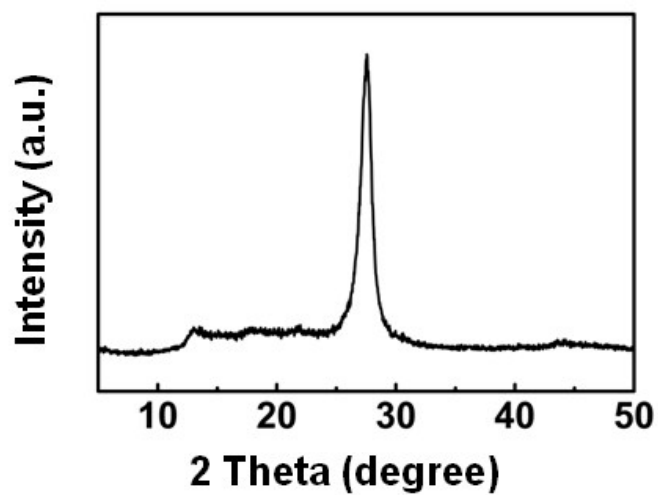

Fig. S4 XRD pattern of g-C<sub>3</sub>N<sub>4</sub>.

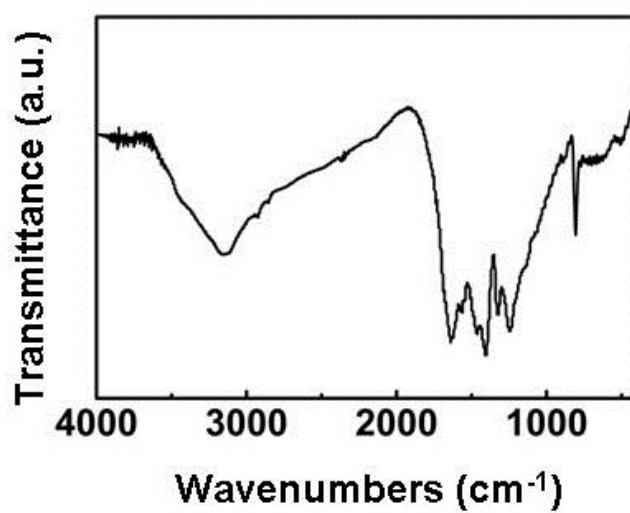

Fig. S5 FT-IR spectra of g-C<sub>3</sub>N<sub>4</sub>.

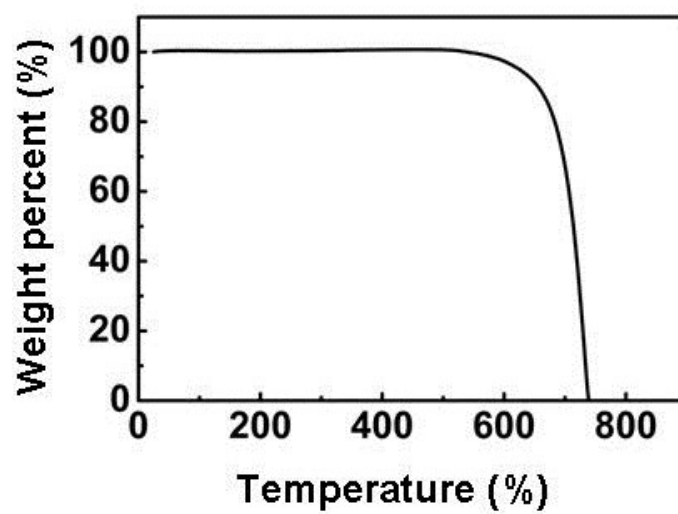

Fig. S6 TG curve of g-C<sub>3</sub>N<sub>4</sub>.

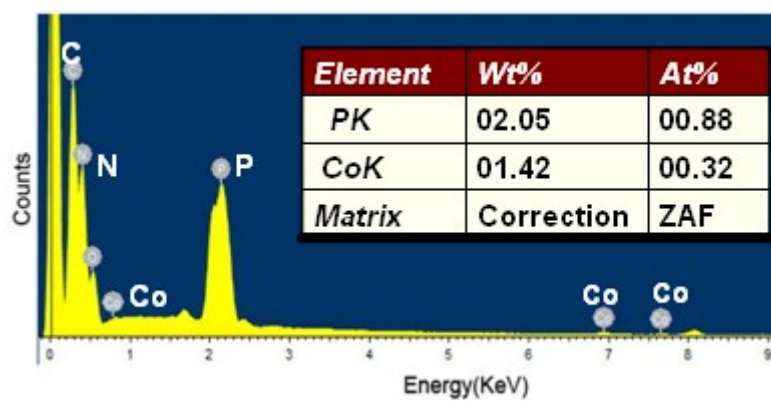

Fig.S7 EDS spectrum of CoP/g-C<sub>3</sub>N<sub>4</sub>-5.

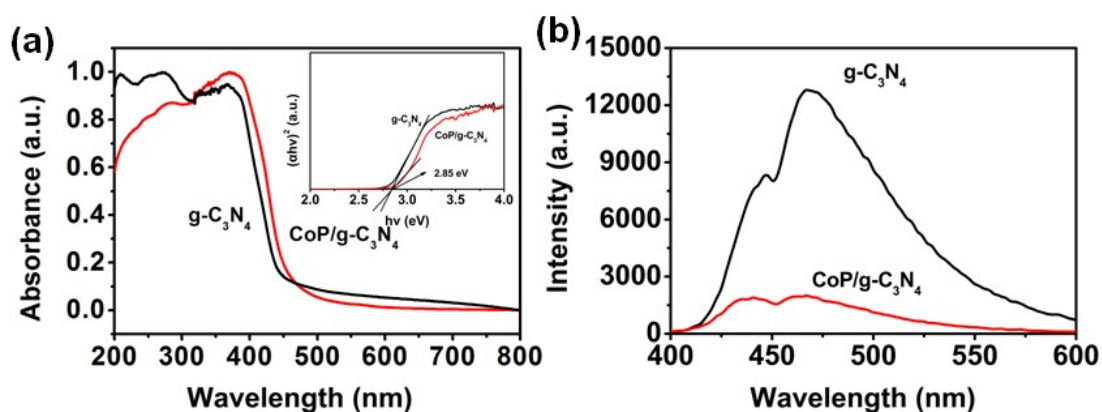

Fig. S8 (a) Diffuse reflectance UV-vis spectra of CoP/g-C<sub>3</sub>N<sub>4</sub> and g-C<sub>3</sub>N<sub>4</sub>. (b) Photoluminescence spectra of as-prepared CoP/g-C<sub>3</sub>N<sub>4</sub> and g-C<sub>3</sub>N<sub>4</sub>.

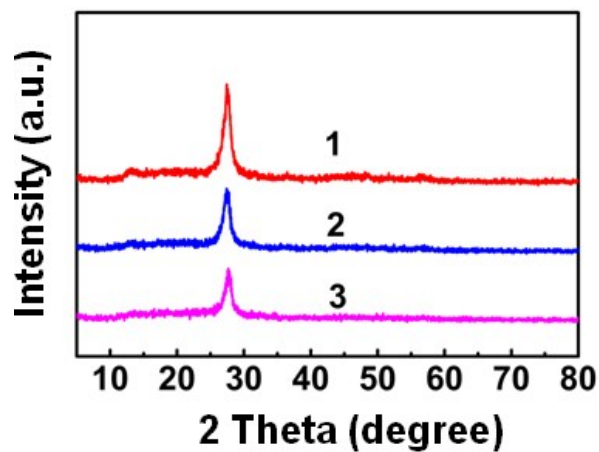

Fig. S9 XRD patterns of (1) Ni<sup>2+</sup> doped CoP/g-C<sub>3</sub>N<sub>4</sub>-3, (2) Ni<sup>2+</sup> doped CoP/g-C<sub>3</sub>N<sub>4</sub>-5, (3) Ni<sup>2+</sup> doped CoP/g-C<sub>3</sub>N<sub>4</sub>-7.

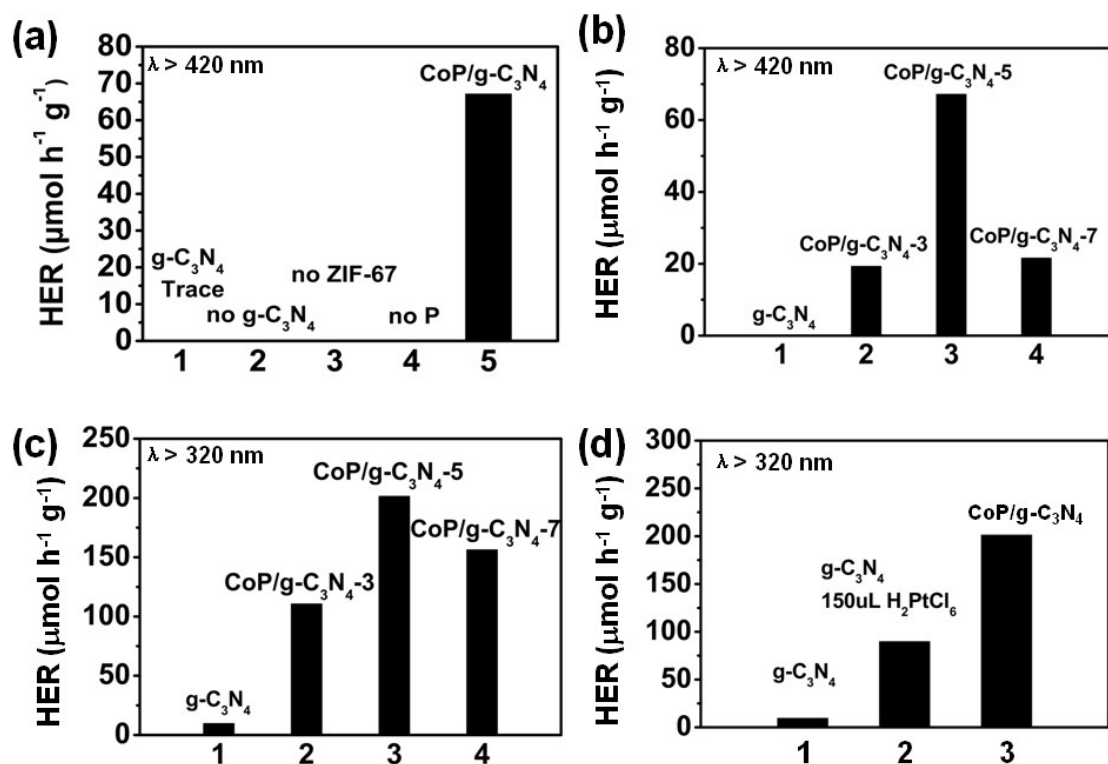

Fig. S10 Comparison of hydrogen production rate of different catalysts. (a) and (b) was under  $\lambda > 420 \text{ nm}$ . (c) and (d) was under  $\lambda > 320 \text{ nm}$ . The concentration of 150 mL  $\text{H}_2\text{PtCl}_6$  aqueous solution is 0.0193 M. The corresponding amount of Pt photodeposited as cocatalyst was 2 wt%.

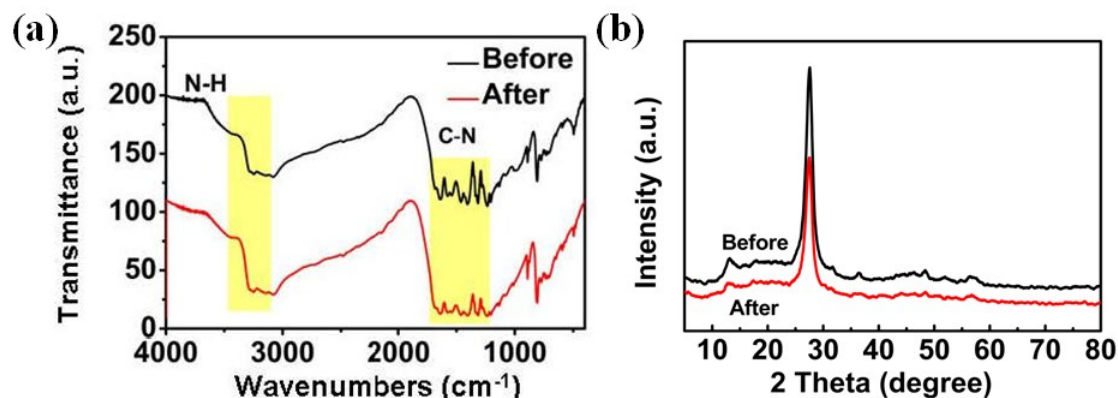

Fig.S11 FT-IR of  $\text{CoP/g-C}_3\text{N}_4$  before and after photocatalysis.



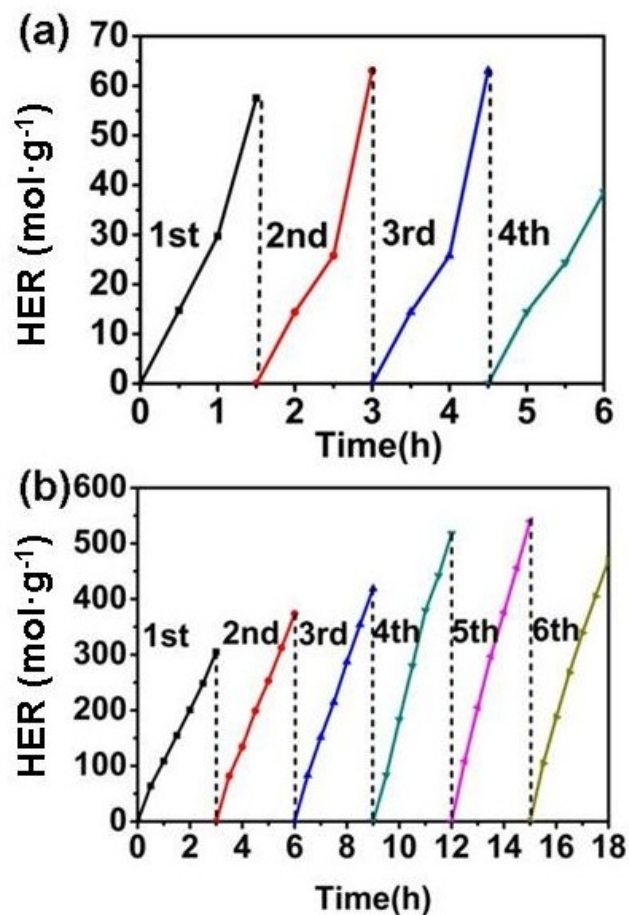

Fig.S12 Photocatalytic hydrogen production of 16 h over CoP/g-C<sub>3</sub>N<sub>4</sub> with evacuation every 3 h.

This system contained 30 mg of the CoP/g-C<sub>3</sub>N<sub>4</sub> photocatalyst and 50 mL of 20 vol% triethanolamine aqueous solution under (a) visible-light irradiation ( $\lambda > 420$  nm) and (b) visible-light irradiation ( $\lambda > 320$  nm), using 300 W Xe lamp as light source.

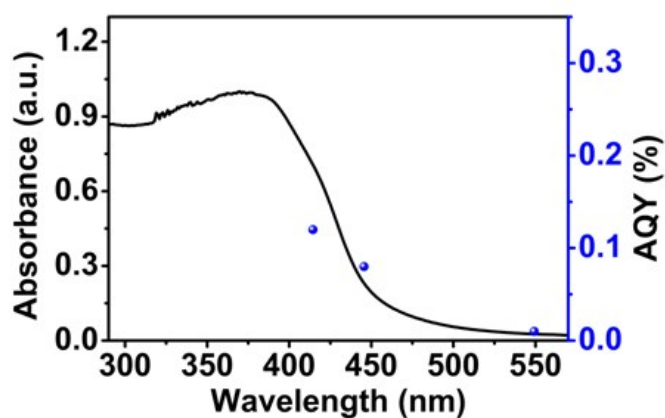

Fig.S13 UV-vis-diffuse reflectance spectrum and AQY of CoP/g-C<sub>3</sub>N<sub>4</sub> along with light wavelength.

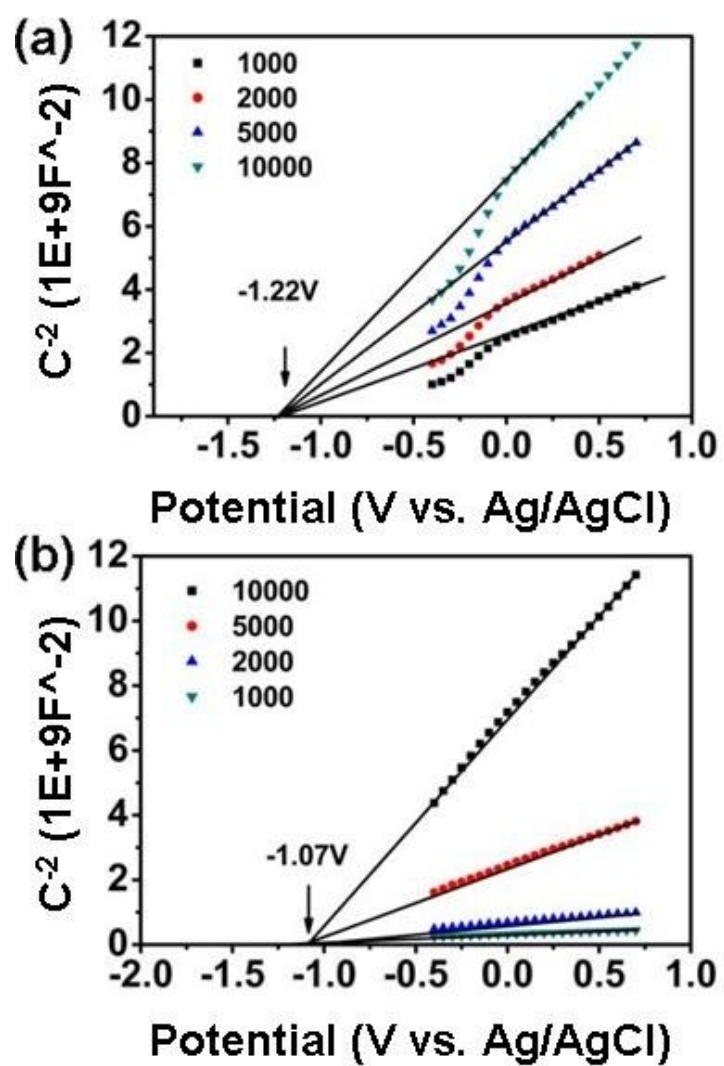

Fig.S14 Mott-Schottky plot of (a) g-C<sub>3</sub>N<sub>4</sub>, (b) CoP/g-C<sub>3</sub>N<sub>4</sub>-5 in 0.1 M Na<sub>2</sub>SO<sub>4</sub> aqueous solution.

Table S1. Summary of various catalysts for photocatalytic H<sub>2</sub> evolution

| Photocatalysts                                                               | sacrificial agent                                                            | Light source                              | Activity                                   | Ref.      |
|------------------------------------------------------------------------------|------------------------------------------------------------------------------|-------------------------------------------|--------------------------------------------|-----------|
| Pt/PtO <sub>2</sub> /CoO <sub>x</sub> /C <sub>3</sub> N <sub>4</sub>         | /                                                                            | 300 W Xe lamp<br>(> 300 nm)               | 61 μmol g <sup>-1</sup> h <sup>-1</sup>    | [1]       |
| UiO-66/g-C <sub>3</sub> N <sub>4</sub> /Pt                                   | 20 mL ascorbic acid solution (0.1 M)                                         | 300 W Xe lamp with a 420 nm cutoff filter | 14.11 × 10 <sup>-6</sup> M h <sup>-1</sup> | [2]       |
| CoS/mpg-CN                                                                   | 100 mL of TEOA (10 vol%)                                                     | 300 W Xe lamp with a 420 nm cutoff filter | 36.5 μmol h <sup>-1</sup>                  | [3]       |
| g-C <sub>3</sub> N <sub>4</sub> /nanocarbon/ZnIn <sub>2</sub> S <sub>4</sub> | 80 mL of 0.35 M Na <sub>2</sub> S and 0.25 M Na <sub>2</sub> SO <sub>3</sub> | Four low power UV-LEDs (3W, 420 nm)       | 29.97 μmol h <sup>-1</sup>                 | [4]       |
| CoP cluster/PCN                                                              | /                                                                            | 300 W Xe lamp                             | 53.8 μmol g <sup>-1</sup> h <sup>-1</sup>  | [5]       |
| CoP/g-C <sub>3</sub> N <sub>4</sub>                                          | 50 mL of TEOA (20 vol%)                                                      | 300 W Xe lamp                             | 201.5 μmol g <sup>-1</sup> h <sup>-1</sup> | This work |

1. G. Zhang, Z. Lan, L. Lin, S. Lin and X. Wang, *Chem. Sci.*, 2016, **7**, 3062-3066.
2. R. Wang, L. Gu, J. Zhou, X. Liu, F. Teng, C. Li, Y. Shen and Y. Yuan, *Adv. Mater. Interfaces*, 2015, **2**, 1500037.
3. Y. Zhu, Y. Xu, Y. Hou, Z. Ding and X. Wang, *Int. J. Hydrogen Energy* 2014, **39**, 11873-11879.
4. F. Shi, L. Chen, M. Chen and D. Jiang, *Chem. Commun.*, 2015, **51**, 17144-17147.
5. L. W, C. L and C. W, *Angew. Chem. Int. Ed.*, 2017, **56**, 9312-9317.
